# Supplementary material
Source: PubMed Central journal article supplement (PMC6287862)
Supplement: ASN.2018050514SupplementaryData1.pdf [file ASN.2018050514SupplementaryData1.pdf]

**SUPPLEMENTAL TABLE**

**Supplemental Table 1. Marginal structural model\* results for the association of incident atrial fibrillation with subsequent incident cardiovascular events in adults with chronic kidney disease.**

| <i>Outcome</i>                             | <i>Estimated HR<br/>(95% CI)</i> | <i>p-value</i> |
|--------------------------------------------|----------------------------------|----------------|
| <b>Incident heart failure</b>              |                                  |                |
| <b>No Incident AF</b>                      | Ref                              |                |
| <b>Incident AF</b>                         | 4.80 ( 3.51 - 6.56 )             | <.0001         |
| <b>Incident MI</b>                         |                                  |                |
| <b>No Incident AF</b>                      | Ref                              |                |
| <b>Incident AF</b>                         | 3.10 ( 2.11 - 4.54 )             | <.0001         |
| <b>Incident stroke</b>                     |                                  |                |
| <b>No Incident AF</b>                      | Ref                              |                |
| <b>Incident AF</b>                         | 1.75 ( 0.99 - 3.09 )             | 0.02           |
| <b>Death</b>                               |                                  |                |
| <b>No Incident AF</b>                      | Ref                              |                |
| <b>Incident AF</b>                         | 3.69 ( 2.93 - 4.64 )             | <.0001         |
| <b>Composite of death and incident CVD</b> |                                  |                |
| <b>No Incident AF</b>                      | Ref                              |                |
| <b>Incident AF</b>                         | 3.68 ( 2.91 - 4.66 )             | <.0001         |

\*Adjusted for age, sex, race/ethnicity, clinical site, diabetes, hypertension, any history of cardiovascular disease, tobacco use, systolic blood pressure, BMI, eGFR, proteinuria, BMI, LDL cholesterol, HDL cholesterol, ACEi/ARB use,  $\beta$ -blocker use and diuretic use
